# Supplementary material for: PrEP in Italy: The time may be ripe but who's paying the bill? A nationwide survey on physicians' attitudes towards using antiretrovirals to prevent HIV infection
Source: PLoS One. 2017 Jul 20;12(7):e0181433. doi: 10.1371/journal.pone.0181433 (PMC5519091; doi:10.1371/journal.pone.0181433)
Supplement: S1 File — (XLSX) [file pone.0181433.s002.xlsx]

## Sheet: Foglio1
ID	Dove lavoro? 1=nord,2=centro,3=sud	Mi occupo di HIV da?1=5,2=10,3=15	Dove lavoro? 1=clinica UNI, 2 OSPEDALE	Nel 2015 non ci sono sufficienti ragioni per rendere disponibile la prescrizione di una PrEP anche in Italia?	Investire in PrEP è secondo voi un uso appropriato delle risorse del SSN?	La PrEP dovrebbe essere fornita gratuitamente dal SSN?	La PrEP dovrebbe essere prescritta dall'infettivologo ed acquistata in Farmacia (Fascia C)?	I Decisori (nel senso delle istituzioni per l'Italia) hanno un obbligo etico nei riguardi della PrEP o comunque di ogni intervento atto a proteggere le persone da una infezione come HIV?	La Prep potrebbe portare alla medicalizzazione della prevenzione di HIV e spostare il focus da altri obiettivi (preservatico, campagne di	La PrEP è un mezzo innovativo per la prevenzione dell'HIV e dovrebbe essere reso disponibile il prima possibile?	La PrEP potrebbe fare più male che bene, se non correttamente impiegata?	La PrEP può essere utile, ma non è ancora tempo per essere ampiamente usata?	La PrEP è sostenuta sola dalla comunità gay e non risulta efficace in altri contesti?	La PrEP è pericolosa e non dovrebbe essere perseguita ulteriormente?	Hai familiarità con la PrEP?	Qualche persona non infetta ti ha già chiesto cos'è la PrEP?	Se si, chi?	Sei mai stato tentato di prescrivere una PrEP?	Se si, a chi?	Qual è il tuo atteggiamento quando ti viene chiesto di PrEP dai pazienti/partner di pazienti?	Realisticamente nel 2020 in Italia sarà disponibile la PrEP?	Quali tra questi fattori consideri importanti per eventualmente implementare la PrEP?
aa	2	3	2	1	5	5	5	3	1	5	1	2	1	2	1	1	1	2	1	3	2	3	5	1	4	7	6	8	2
ab	1	2	1	1	4	4	1	3	2	4	3	2	4	3	2	1					2	1	5	2	3	4	6	7	8
ac	1	3	1	2	3	4	1	2	1	4	1	2	2	4	2	1	1	2		2	2	3	7	1	2	6	4	5	8
ad	1	1	2	3	1	2	4	1	3	3	2	3	4	5		2		1	1	2	2	2	5	3	4	8	6	7	1
ae	1	3	2	5	2	2	5	1	4	2	2	5	5	5	2	2		1	1	2	2	1	3	8	6	5	2	7	4
af	1	3	2	1	5	5	4	4	1	5	1	4	2	2	2	2		2		2	2	7	8	6	4	1	2	3	5
ag	3	3	1	1	5	5	1	3	1	5	3	3		3	2	2		2			1
ah	3	3	1	4	4	4	4	2	3	2	2	2	4	4	2	1	1	1	1	2	1	1	5	7	2	4	6	8	3
ai	2	3	2	2	3	4	2	2	2	4	2	2	3	3	2	2		2		2	2	7	5	3	1	4	6	8	2
al	3	2	1		4	4	2	2	2	3	4	4	2	4	1	1	1	1	1	2	2	2	3	4	5	7	6	8	1
am	2	3	2	3	2	2	2	3	3	2	4	4	4	2	2	2		2		2	1
an	3	3	1	2	4	4	2	3	4	4	2	2	2	4	2	1	1	2		2	2
ao	2	3	1	4	3	3	2	3	5	3	2	4	2	1	2	1	1	1	1	2	1	1	2	7	3	8	4	5	6
ap	3	3	1	4	2	4	2	2	2	4	2	4	4	5	1	1	1	1	1	1	1	1	2	3	8	4	6	5	7
aq	1	3	1	1	1	1	1	1	4	1	1	5	5	5	2	1	1	1	3	2	1
ar	1	3	1	2	3	4	2		2	3	2	2		4	2	1	1	2		2	2
as	1	3	2	4	4	5	4	3	2	4	2	2	2	2	2	1	2	1	2	2	2	4	5	7	6	2	1	3	8
at	3	3	1	3	4	5	2	1	2	3	2	3	4	4	1	1	1	1	1	2	2	5	6	7	1	4	2	3	8
au	2	3	1	3	4	4	4	2	2	3	2	2	2	3	2	1	1	1	1	2	1	2	8	5	1	6	7	3	4
av	2	3	2	2	5	4	4	3	1	5	3	1	2	3	2	1	1	2		3	2	3	4	5	1	8	6	7	2
az	3	2	1	5	2	3	2	2	4	2	2	2	3	2	1	1	1	1	1	2	1	2	3	4	1	5	6	7	8
ba	3	2	2	2	2	2	2	3	2	2	2	2	3	2	1	1	1	1	1	2	1	3	4	2	1	7	6	8	5
bb	1	2	1	5	3	1	3	4	1	3	3	3	1	1	1	1	1	1	1	2	1	1	5	6	2	7	3	8	4
bc	1	2	1	5	2	1	5	4	3	3	3	4	4	1	1	1	1	1	1	2	2	3	2	1	7	4	6	5	8
bd	1	1	2	4	3	4	5	2	2	5	2	4	4	4	2	2		1	1	2	1	3	4	1	2	8	5	7	6
be	1	2	2	1	5	5	1	2	1	5	1	3	3	2	2	2		2		3	1	6	7	4	3	5	1	2	8
bf	1	2	2	2	4	4	3	3	2	5	1	2	2	3	2	2		2		3	1	1	3	4	2	6	5	7	8
bg	1	2	2	1	5	5	2	3	1	5	2	3	3	3	2	2		2		3	2	6	7	5	1	4	3	2	8
bh	1	2	2	1	3	3	3	2	2	1	4	4	5	5	2	1	1	1	1	3	1	3	7	6	2	5	4	8	1
bi	1	1	2	4	3	5	1	1	1	4	1	4	5	5	2	1	1	1	1	2	1	1	8	2	7	5	4	6	3
bl	1	1	2	1	5	5	5	3	1	5	1	2	5	2	2	2		2		3	2	6	7	1	2	5	3	8	4
bm	1	3	2	5	5	5	4	5	5	5	2	4	4	2	1	1	3	2		3	2
bn	1	1	2	2	4	4	3	2	2	4	2	2	4	4	2	2		2		2	2
bo	1	2	1	5	2	5	1	1	5	1	4	1	4	4	2	1	1	2		1	1	1	4	5	3	6	7	8	2
bp	1	2	2	4	1	2	4	1	1	2	4	3	4	5	2	2		1	1	2	1	1	8	2	3	6	5	7	4
bq	1	2	1	3	2	5	2	3	3	3	2	2	4	4	2	1	1	1	1	2	2	1	5	4	2	3	6	7	8
br	1	2	2	4	2	4	2	2	2	2	2	4	4	4	1	1	1	2		2	1	2	3	1	4	6	7	5	8
bs	1	1	1	2	2	3	4	2	3	2		3	3	5	2	1	1	2		2	1	3	4	2	1	4	5	7	8
bt	1	1	2	3	2	4	2	3	2	4	4	3	2	5	2	2		2		1	1	1	8	3	4	6	7	5	2
bu	3	1	2	3	1	1	2	1	3	2	3	2	3	4	1	1		1	1	1	1	1	4	8	2	6	3	7	5
bv	3	3	2	1	4	4	3	2	3	3	2	3	2	2	1	1	2	1	2	2	1	2	8	4	1	5	3	7	6
bz	3	3	2	2	5	4	4	3	2	4	2	3	2	2	1	1	1	1	1	3	2	1	7	4	2	3	5	8	6
ca	3	3	2	2	3	4	3	2	3	3	2	2	2	2	1	1	1	1	1	2	1	1	7	3	2	4	5	6	8
cb	3	2	2	2	3	2	3	2	2	2	1	1	2	2	2	1	1	1	1	2	1	1	8	4	2	5	3	7	6
cc	1	3	2	1	4	4	2	4	5	2	3	4	4	5	2	1	1	2		2	2	4	6	7	1	5	3	2	8
cd	1	3	1	1	5	5	5	3	3	3		3	2	3	2	2		2		2	2	2	8	1	5	3	7	6	4
ce	1	3	1	3	4	3	2	2	1	3	1	2	1	4	2	2		2		2	1	1	8	7	6	3	4	5	2
cf	1	3	1	3	3	3	2	2	2	3	2	3	4	4	1	2		2		2	1	1	5	3	2	8	4	6	7
cg	1	3	1	2	3	1	1	1	1	1	2	3	4	4	2	2		1	2	2	1	1	2	5	3	8	4	6	7
ch	1	3	1	2	2	2	2	2	2	2	2	2	1	4	2	1	1	1	1	2	1	1	2	3	5	4	6	7	8
ci	1	3	1	2	2	4	2	2	2	3	2	4	2	4	2	2		2		2	1	7	2	4	3	8	6	5	1
cl	1	3	1	1	4	5	5	1	1	2	2	2	2	4	2	2		2		2	1	7	6	2	1	5	3	4	8
cm	1	3	1	4	1	1	2	1	4	3	4	4	3	4	2	1	1	1	1	2	1	1	5	6	8	2	3	4	7
cn	1	3	1	3	2	2	2	2	3	2	2	3	4	4	1	2		1	1	2	1	1	8	7	6	3	4	5	2
co	1	3	1	2	4	4	2	2	2	4	2	2	2	2	2	2		2		1	2	7	6	5	1	2	3	4	8
cp	1	3	1	2	4	2	2	2	1	3	2	2	3	3	2	2		2		2	2	1	7	5	2	6	3	4	8
cq	1	3	1	5	2	2	5	2	4	1	3	4	3	4	2	1	1	1	1	2	1	4	2	1	3	5	8	7	6
cr	3	2	1	5	5	5	3	5	5	3	1	3	3	3	1	2	1	1	1	2	2	2	6	5	4	3	7	1	8
cs	3	1	2	4	5	5	5	3	1	4	1	1	4	3	1	1	1	1	1	2	1	6	7	5	3	2	8	1	4
ct	3	3	1	5	5	5	4	5	1	4	1	4	3	2	1	1	1	1	1	2	2	1	8	3	2	4	7	3	5
cu	3	1	1	2	5	5	1	5	1	5	1	1	5	1	1	1	1	1	1	2	1	6	7	1	5	8	3	4	2
cv	2	3	1	4	3	3	3	2	3	2	4	4	3	5	2	1	1	1	1	2	1	6	1	7	5	8	2	4	3
cz	2	3	2	4	3	4	2	1	3	3	4	3	4	5	2	1	1	1	1	2	1	1	8	5	2	3	6	7	4
da	2	3	1	1	2	1	4	4	5	2	5	4	1	3	1	1	1	1	1	3	1	1	4	3	6	3	8	7	5
db	1	3	1	2	5	4	2	3	1	5	2	2	3	4	2	1	1	2		2	2	4	6	5	2	8	3	7	1
dc	2	3		4	5	5	4	3	1	5	1	2	3	3	1	1	3	2		2	2
dd	2	2	2	1	4	4	2		2	4	2	2	3	2	2	2		2		3	2
de	2	3	2	3	3	4	1	1	4	2	5	5	2	5	2	1	1	1	1	2	1
df	2	3	2	5	5	5	1	5	1	5	1	5	2			1	1	1	1	2	2
dg	2	3	2	1	5	5	2	5	1	5	3	4	3	3	2	1	3	2	1	3	2
dh	2	3	2	4	2	4	1	3	1	4	4	4	2	2	2	1	3	1	1	2	1	7	6	4	3	8	1	5	2
di	1	1	1	2	4	4	4	1	1	4	1	4	5	4	2	1	1	2		2	2	7	6	5	2	8	4	3	1
dl	1	2		1	1	3	4	1	1	4	1	2	3	3	1	1	2	1	1	3	1	2	8	1	3	5	6	7	4
dm	1	1	1	1	2	4	5	1	1	2	1	4	1	5	2	2		1	1	2	2	1	8	2	7	3	6	5	4
dn	3	1	1	2	2	3	2	2	2	2	4	2	4	4	2	1	1	1	1	2	1	2	1	5	3	4	7	8	6
do	3	1	1	3	4	4	2	1	1	4	1	3	3	2	1	1	1	2		2	2	4	8	2	7	5	6	3	1
dp	3	1	1	4	2	2	4	2	2	4	2	4	4	4	2	2				3	2	1	6	3	5	4	7	8	2
dq	3	3	1	1	4	4	1	3	1	4	2	1	4	3	1	1	1	1	1	2	2	1	5	2	3	4	7	8	6
dr	3	1	1	4	2	3	1	3	3	2	4	3	2	2	1	2		1	2	2	2
ds	3	1	1	2	4	5	3	3	2	3	2	2	4	4	2	1	1	2		2	2	3	2	4	1	5	6	7	8
dt	1	1	2	2	3	4	2	2	2	2	4	4	4	5	1	1	1	1	1	2	1	1	4	5	2	7	6	8	3
du	1	3	2	2	2	5	3	4	4	2	3	3	1	5	2	1	1	2		2	1	2	6	3	1	7	4	8	5
dv	1	3	1	5	5	4	2	1	5	1	5	5	4	5	1	1	1	1		1	1	2	3	4	7	5	6	8	1
dz	1	3	2	3	4	5	2	3	2	3	1	3	3	1	2	1	2	2	3	2	1	3	6	2	8	5	4	1	7
ea	1	1	1	1	5	5	5	1	1	5	1	3	5	1	2	1	1	2		3	2	1	8	6	4	3	5	2	7
eb	3	1	2	4	2	3	1	3	3	2	4	3	2	2	1	2		1	2	2	2	1	8	3	2	7	5	4	6
ec	1	2	2	4	3	4	3	3	1	4	1	1	3	4	1	1	1	1	1	1	1	1	3	4	2	6	7	8	5
ed	1	3	2	4	2	3	2	3	1	3	1	3	2	4	2	1	1	1	1	2	1	1	3	4	2	7	5	8	6
ee	1	3	2	4	4	4	2	3	1	4	1	1	3	4	2	1	1	2		2	1	1	3	5	2	7	4	8	6
ef	1	3	2	3	4	4	2	3	1	4	1	3	4	4	2	2		1	1	2	1	3	7	6	1	5	2	8	4
eg	1	3	1	4	4	4	2	4	1	4	2	3	4	5	1	1	1	1	1	2	1
eh	1	3	1	2	4	4	2	2	1	4	5	2	2	2	1	1	1	1	1	2	1	1	8	3	6	5	4	7	2
ei	2	3	2	3	3	5	2	3	5	1	5	2	3	3	2	2		2		2	2	4	8	3	6	5	1	2	7
el	2	3	2	2	4	3	2	2	1	4	1	2	2	2	2	2		2		2	1	1	4	3	5	6	2	7	8
em	2	3	2	4	5	5	2	3	1	4	4	4	2	3	2	2		2		2	2	1	7	2	3	6	4	5	8
en	2	3	2	2	4	4	2	3	2	4	2	1		4	2	2		1	1	2	1	2	6	7	4	5	1	3	8
eo	1	1	1	4	2	2	5	3	2	4	2	3	4	4	2	1	1	1	1	2	1	1	2	3	7	4	5	6	8
ep	3	1	2	4	4	5	2	1	1	3	1	3	2	4	2	1	1	2		3	1	1	6	3	4	5	7	2	8
eq	3	1	1	4	4	5	2	1	1	3	1	2	2	4	1	1	1	2		3	1	3	7	6	2	4	5	1	8
er	3	1	2	4	5	5	2	1	2	3	1	3	1	5	1	1	2	1	2	2	1	1	6	3	4	5	8	2	7
es	3	1	1	4	4	5	2	1	1	3	1	3	1	4	1	2		2		3	1	3	8	7	2	4	6	1	5
et	3	1	1	3	4	4	1	2	2	4	1	3	3	2	1	1	1	2		3	2	6	8	2	7	5	4	3	1
eu	1	1	1	1	5	5	5	1	1	4	1	2	1	2	2	1	1	2		3	2	2	8	5	1	6	7	4	3
ev	1	2	1	2	4	4	1	2	2	4	2	2	2	3	2	1	1	2		2	2	1	6	5	4	7	8	3	2
ez	1	3	2	2	4	3	3	4	2	1	2	3	3	3	2	2		2		2	2	8	7	6	1	5	2	3	4
fa	1	3	1	2	4	4	1	2	1	4	1	2	2	4	2	2		2		2	2	3	7	1	2	6	4	5	8
fb	1	3	2	4	5	5	4	3	2	3	2	2	4	3	1	1	1	1	1	2	1	5	6	7	1	2	8	3	4
fc	1	3	2	2	4	4	4	2	5	4	2	4	4	4	2	1	1	2		3	2	5	6	8	1	2	3	4	7
fd	1	3	2	4	4	4	4	2	2	4	2	3	3	2	2	2		2		2	2	1	8	5	2	6	3	4	7
fe	1	3	2	2	4	5	1	2	1	4	2	4	3	3	2	1	1	1	1	2	1	8	7	1	6	5	4	3	2
ff	1	1	1	2	4	3	3	4	4	2	4	5	3	1	2	1	3	1	1	2	1	1	6	8	7	2	4	3	5
fg	3	2	1	5	4	5	2	5	4	4	2	2	2	4	2	1	1	2		3	1
fh	1	2	2	1	4	4	2	5	1	2	1	2	2	3	2	1		1	1	2	1
fi	1	3	2	1	4	4	2	5	1	4	1	2	2	3	2	2		2		3	1	2	8	4	3	5	6	7	1
fl	1	3	2	2	5	5	4	2	1	5	2	3	4	1	2	2		2			2	7	8	4	3	6	1	2	5
fm	1	3	2	3	5	5	5	2	1	5	4	3	5	2	2	2		2		2	2	2	1	3	4	7	5	8	6
fn	3	3	1		4	5	2	2	1	3	2	2	3	3	2	2		2		3	2	6	8	5	1	4	3	2	7
fo	3	1	1	3	3	3	2	2	1	3	1	2	4	5	1	1		1	1	2	2	4	5	1	6	3	7	8	2
fq	3	3	1	4	2	3	2	2	1	4	2	3	5	5	1	1	3	1	1	2	2	5	7	6	1	4	3	2	8
fr	3	3	1	3	2	4	2	4	1	3	2	2	3	4	2	2		2		2	1	3	7	4	1	2	6	5	8
fs	3	1	1	3	2	2	2	2	2	2	4	4	5	5	1	1	1	1	1	1	1	1	5	4	2	6	3	7	8
ft	3	1	1	4	3	3	2	2	3	2	3	2	4	4	2	2		2		2	2	1	2	4	3	7	5	8	6
fu	3	1	1	4	4	2	2	2	1	3	1	3	5	5	2	2		1	1	2	1	3	1	5	2	4	8	6	7
fv	3	1	1	2	4	4	2	4	4	4	1	2	3	3	2	1	1	2		2	2	4	8	3	1	2	7	6	5
fz	2	3	2	3	5	5	2	3	1	4	3	4	4	4	1	1	1	1	1	2	1	1	4	5	2	7	6	8	3
ga	3	3	2	4	2	1	4	1	2	1	4	4	4	5	1	1	1	1	1	2	1	8	3
gc	2	3	2	1	1	5	1	5	1	5	1	2	1	1	2	2		2		2	2
gd	2	3	2	4	5	4	5	5	1	2	1	4	2	1	2	1	2	2		2	2	5
ge	3	3	2	4	2	1	1	1	4	1	4	4	4	4	1	1	1	1	1	2	1	1	6	8	3	4	2	7	5
gf	2	1	2	4	2	4	4	2	4		2		4	4	2	2		1	1		1	2	1	5	4	7	6	8	3
gg	1	3	1	2	4	5	2	4	1	4	2	3	2	1	2	2		2		2	1	6	5	7	1	8	2	4	3
gh	2	3	1	5	2	4	1	2	1	2	1	3	5	5	1	1	1	1	1	2	2	4	3	2	5	6	8	7	1
gi	2	1	2	4	5	5	1	4	4	5	1	2	2	4	2	2		2		3	1	7	6	2	3	5	4	8	2
gl	2	3	2	4	2	3	2	2	4	2	4	4	4	4	2	1		2			1	1	3	2
gm	1	3	2	3	2	3	2	2	2	2	4	4	3	4	1	1	1	1	1	1	1	1	3	4	5	2
gn	3	3	2	2	5	5	1	5	1	3	1	1	3	3								2	3
go	2	1	1	2	4	4	2	2	1	3	4	2	2	4	2	2		2		3	1	1	2	4	5	6	7	8	3
gp	2	1	2	2	4	5	2	2	2	3	2	3	4	3	1	1	1	1	1	2	1	4	6	1	2	7	3	5	8
gq	2	3	2	2	5	5	2	2	2	5	1	4	2	1	2	2		1	1	3	2	2	3	4	8	5	6	7	1
gr	1	3	1	2	4	4	1	3	2	2	2	2	4	4	1	1	1	1	1	2	1	3	4	7	1	6	5	8	2
gs	1	3	1	5	3	4	2	2	4	1	5	5	4	5	2	2		2		1	1	1	2	6	7	3	5	8	4
gt	2	3	1	1	5	5	1	5	1	1	4	2	3	4	1	1	1	2		2	2	1	7	6	5	3	2	4	8
gu	2	3	2	3	4	4	4	2	2	4	2	4	3	3	1	1	1	1	1	2	2
gv	2	2	2	3	5	5	2	5	5	1	4	4	1	4	1	1	1	2		2	1	1	7	3	4	5	6	2	8
gz	2	1	2	1	5	5	5	2	1	4	2	2	4	2	2	2		2		3	2	1	7	4	2	3	6	5	8
ha	2	3	2		5	5	4		2		1	4	3		2	1	1			2	1	1	2	7	3	4	6	5	8

## Sheet: Foglio2
ID
aa	3	5	1	4	7	6	8	2
ab	1	5	2	3	4	6	7	8
ac	3	7	1	2	6	4	5	8
ad	2	5	3	4	8	6	7	1
ae	1	3	8	6	5	2	7	4
af	7	8	6	4	1	2	3	5
ag
ah	1	5	7	2	4	6	8	3
ai	7	5	3	1	4	6	8	2
al	2	3	4	5	7	6	8	1
am
an
ao	1	2	7	3	8	4	5	6
ap	1	2	3	8	4	6	5	7
aq
ar
as	4	5	7	6	2	1	3	8
at	5	6	7	1	4	2	3	8
au	2	8	5	1	6	7	3	4
av	3	4	5	1	8	6	7	2
az	2	3	4	1	5	6	7	8
ba	3	4	2	1	7	6	8	5
bb	1	5	6	2	7	3	8	4
bc	3	2	1	7	4	6	5	8
bd	3	4	1	2	8	5	7	6
be	6	7	4	3	5	1	2	8
bf	1	3	4	2	6	5	7	8
bg	6	7	5	1	4	3	2	8
bh	3	7	6	2	5	4	8	1
bi	1	8	2	7	5	4	6	3
bl	6	7	1	2	5	3	8	4
bm
bn
bo	1	4	5	3	6	7	8	2
bp	1	8	2	3	6	5	7	4
bq	1	5	4	2	3	6	7	8
br	2	3	1	4	6	7	5	8
bs	3	4	2	1	4	5	7	8
bt	1	8	3	4	6	7	5	2
bu	1	4	8	2	6	3	7	5
bv	2	8	4	1	5	3	7	6
bz	1	7	4	2	3	5	8	6
ca	1	7	3	2	4	5	6	8
cb	1	8	4	2	5	3	7	6
cc	4	6	7	1	5	3	2	8
cd	2	8	1	5	3	7	6	4
ce	1	8	7	6	3	4	5	2
cf	1	5	3	2	8	4	6	7
cg	1	2	5	3	8	4	6	7
ch	1	2	3	5	4	6	7	8
ci	7	2	4	3	8	6	5	1
cl	7	6	2	1	5	3	4	8
cm	1	5	6	8	2	3	4	7
cn	1	8	7	6	3	4	5	2
co	7	6	5	1	2	3	4	8
cp	1	7	5	2	6	3	4	8
cq	4	2	1	3	5	8	7	6
cr	2	6	5	4	3	7	1	8
cs	6	7	5	3	2	8	1	4
ct	1	8	3	2	4	7	3	5
cu	6	7	1	5	8	3	4	2
cv	6	1	7	5	8	2	4	3
cz	1	8	5	2	3	6	7	4
da	1	4	3	6	3	8	7	5
db	4	6	5	2	8	3	7	1
dc
dd
de
df
dg
dh	7	6	4	3	8	1	5	2
di	7	6	5	2	8	4	3	1
dl	2	8	1	3	5	6	7	4
dm	1	8	2	7	3	6	5	4
dn	2	1	5	3	4	7	8	6
do	4	8	2	7	5	6	3	1
dp	1	6	3	5	4	7	8	2
dq	1	5	2	3	4	7	8	6
dr
ds	3	2	4	1	5	6	7	8
dt	1	4	5	2	7	6	8	3
du	2	6	3	1	7	4	8	5
dv	2	3	4	7	5	6	8	1
dz	3	6	2	8	5	4	1	7
ea	1	8	6	4	3	5	2	7
eb	1	8	3	2	7	5	4	6
ec	1	3	4	2	6	7	8	5
ed	1	3	4	2	7	5	8	6
ee	1	3	5	2	7	4	8	6
ef	3	7	6	1	5	2	8	4
eg
eh	1	8	3	6	5	4	7	2
ei	4	8	3	6	5	1	2	7
el	1	4	3	5	6	2	7	8
em	1	7	2	3	6	4	5	8
en	2	6	7	4	5	1	3	8
eo	1	2	3	7	4	5	6	8
ep	1	6	3	4	5	7	2	8
eq	3	7	6	2	4	5	1	8
er	1	6	3	4	5	8	2	7
es	3	8	7	2	4	6	1	5
et	6	8	2	7	5	4	3	1
eu	2	8	5	1	6	7	4	3
ev	1	6	5	4	7	8	3	2
ez	8	7	6	1	5	2	3	4
fa	3	7	1	2	6	4	5	8
fb	5	6	7	1	2	8	3	4
fc	5	6	8	1	2	3	4	7
fd	1	8	5	2	6	3	4	7
fe	8	7	1	6	5	4	3	2
ff	1	6	8	7	2	4	3	5
fg
fh
fi	2	8	4	3	5	6	7	1
fl	7	8	4	3	6	1	2	5
fm	2	1	3	4	7	5	8	6
fn	6	8	5	1	4	3	2	7
fo	4	5	1	6	3	7	8	2
fq	5	7	6	1	4	3	2	8
fr	3	7	4	1	2	6	5	8
fs	1	5	4	2	6	3	7	8
ft	1	2	4	3	7	5	8	6
fu	3	1	5	2	4	8	6	7
fv	4	8	3	1	2	7	6	5
fz	1	4	5	2	7	6	8	3
ga	8	3
gc
gd	5
ge	1	6	8	3	4	2	7	5
gf	2	1	5	4	7	6	8	3
gg	6	5	7	1	8	2	4	3
gh	4	3	2	5	6	8	7	1
gi	7	6	2	3	5	4	8	2
gl	1	3	2
gm	1	3	4	5	2
gn	2	3
go	1	2	4	5	6	7	8	3
gp	4	6	1	2	7	3	5	8
gq	2	3	4	8	5	6	7	1
gr	3	4	7	1	6	5	8	2
gs	1	2	6	7	3	5	8	4
gt	1	7	6	5	3	2	4	8
gu
gv	1	7	3	4	5	6	2	8
gz	1	7	4	2	3	6	5	8
ha	1	2	7	3	4	6	5	8
